# Supplementary material
Source: ML conference proceedings conference paper supplement (https://aclanthology.org/D19-5907)
Supplement: Attachment [file D19-5907.Attachment.pdf]

# CoSSAT: Code-Switched Speech Annotation Tool

September 3, 2019

## 1 User Interface

### 1.1 Baseline System

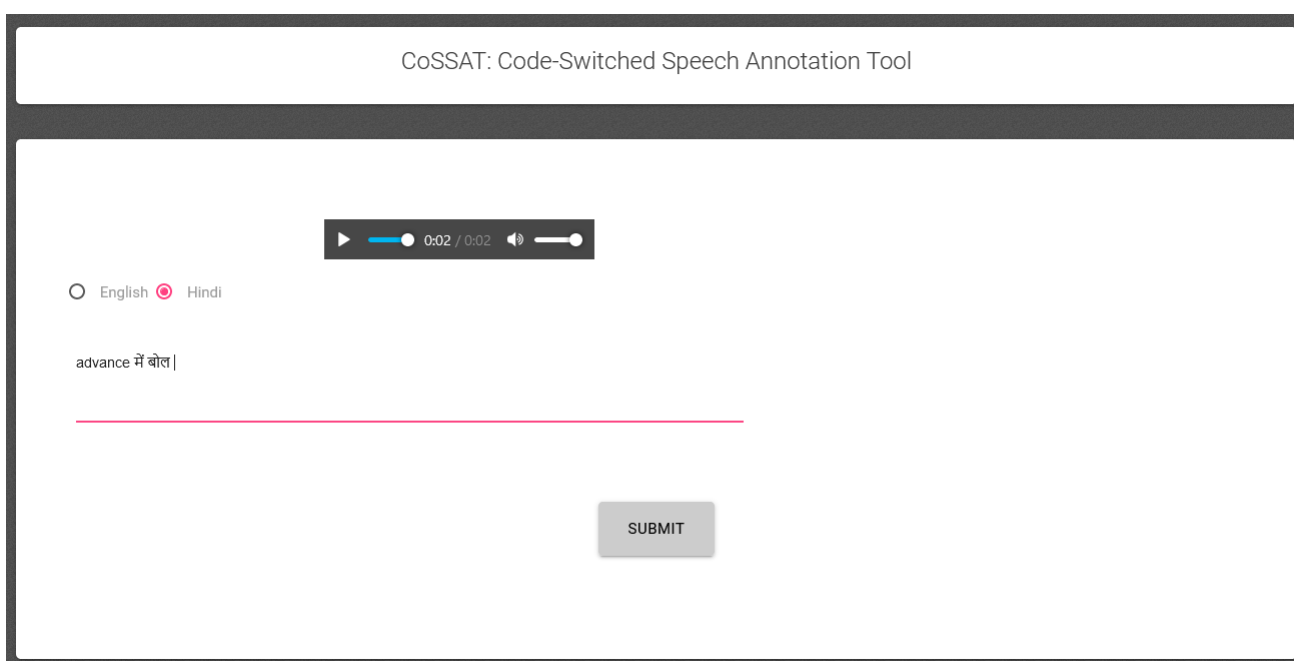

Figure 1: Baseline System

### 1.2 CoSSAT

## 2 User Feedback

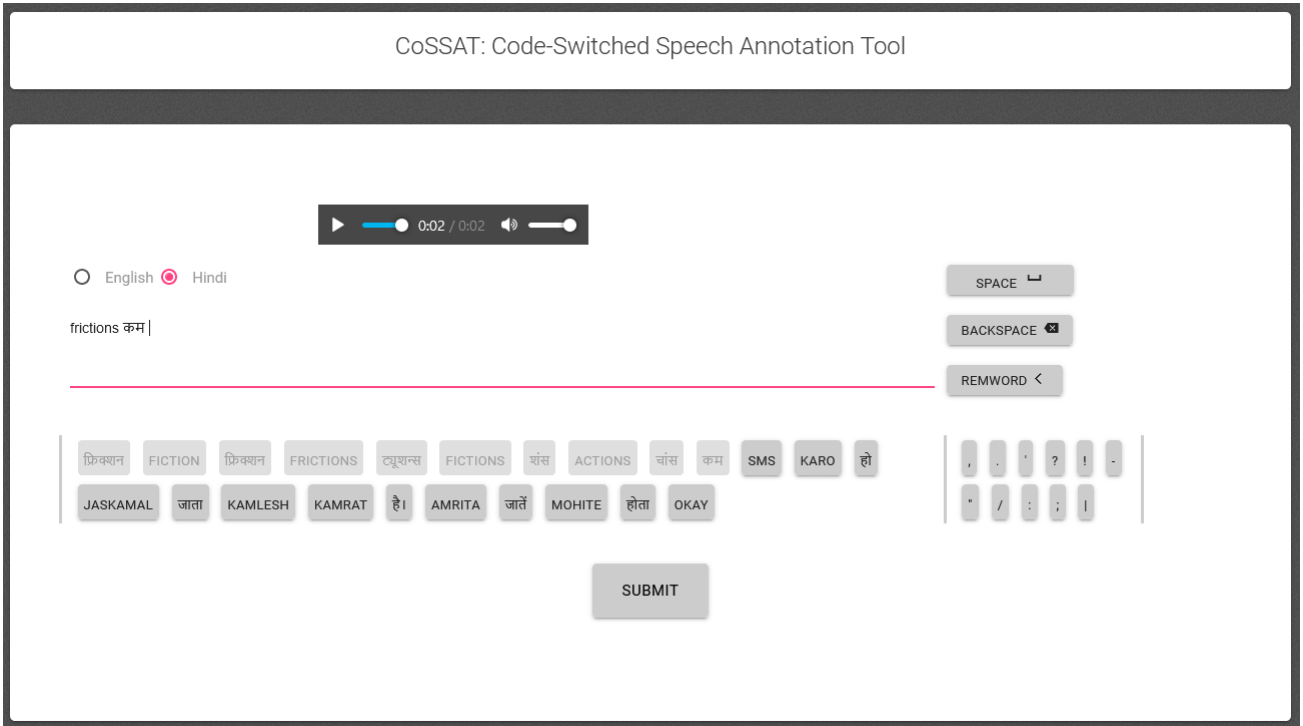

Figure 2: CoSSAT (Code-Switched Speech Annotation Tool )

5. Please rate Annotation System with Word Buttons (from of 1 [worst] to 5 [best]) in terms of the following criteria:

[More Details](#)

1 2 3 4 5

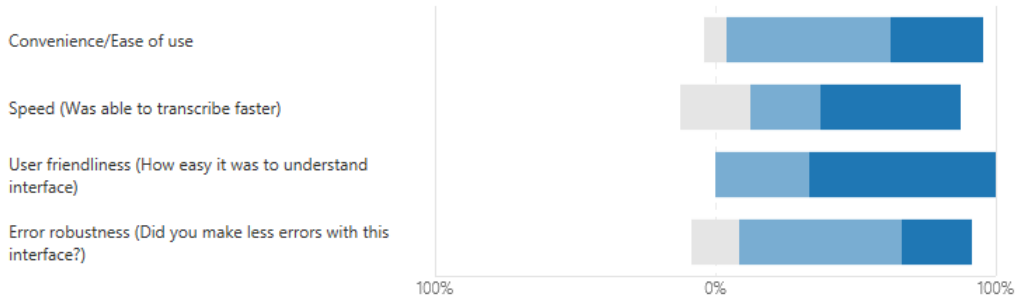

Figure 3: Feedback from users regarding their experience with CoSSAT

6. Please rate Annotation System without Word Buttons (from of 1 [worst] to 5 [best]) in terms of the following criteria:

[More Details](#)

1 2 3 4 5

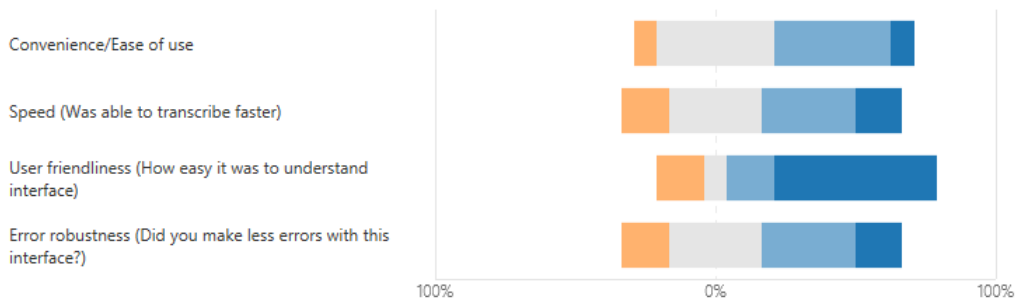

Figure 4: Feedback from users regarding their experience with Baseline System

7. Which annotation system would you prefer to use if you were regularly transcribing long code-mixed speeches/audio?

[More Details](#)

- Annotation System with Word... 7
- Annotation System without W... 2
- Other 3

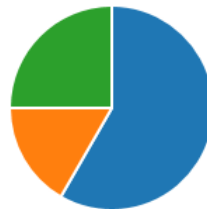

Figure 5: Overall User Feedback
